# Supplementary material for: An effective non-covalent grafting approach to functionalize individually dispersed reduced graphene oxide sheets with high grafting density, solubility and electrical conductivity
Source: Royal Society of Chemistry journal article supplement (doi:10.1039/c4nr06710j), 2015-01-01
Supplement: c4nr06710j1.pdf [file c4nr06710j1.pdf]

## An Effective Non-Covalent Grafting Approach to Functionalizing Individually Dispersed Graphene Sheets with High Grafting Density, Solubility and Electrical Conductivity

Hao-Wang,<sup>a</sup> Shu-Guang Bi,<sup>a</sup> Yun-Sheng Ye<sup>a,\*</sup> Yang Xue,<sup>a</sup> Xiao-Lin Xie,<sup>a</sup> Yiu-Wing Mai,<sup>b</sup>

<sup>a</sup> Key Laboratory for Large-Format Battery Materials and Systems, Ministry of Education, School of Chemistry and Chemical Engineering, Huazhong University of Science and Technology, Wuhan 430074, China.

<sup>b</sup> Centre for Advanced Materials Technology (CAMT), School of Aerospace, Mechanical and Mechatronic Engineering J07, The University of Sydney, Sydney, NSW 2006, Australia

E-Mail: [ysye@hust.edu.cn](mailto:ysye@hust.edu.cn)

## Supplementary Information

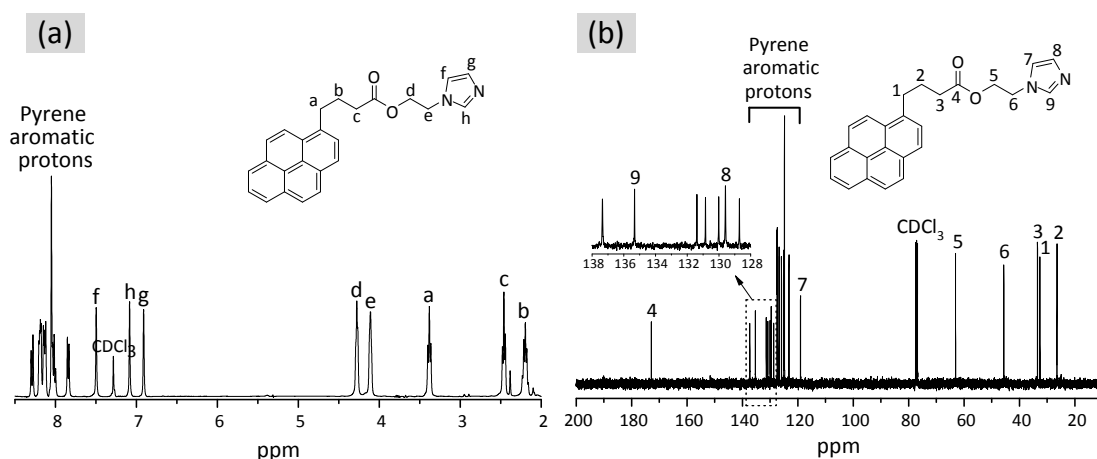

**Figure S1.** (a) <sup>1</sup>H-NMR and (b) <sup>13</sup>C-NMR spectra of imidazole pyrene (Im-Py)

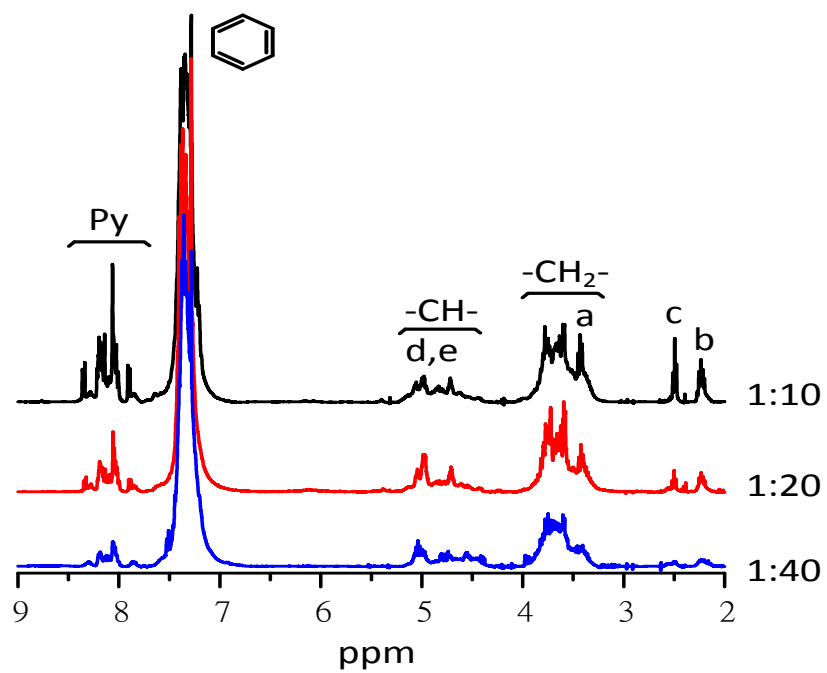

**Figure S2.**  $^1\text{H-NMR}$  spectrum of PSO-Py.

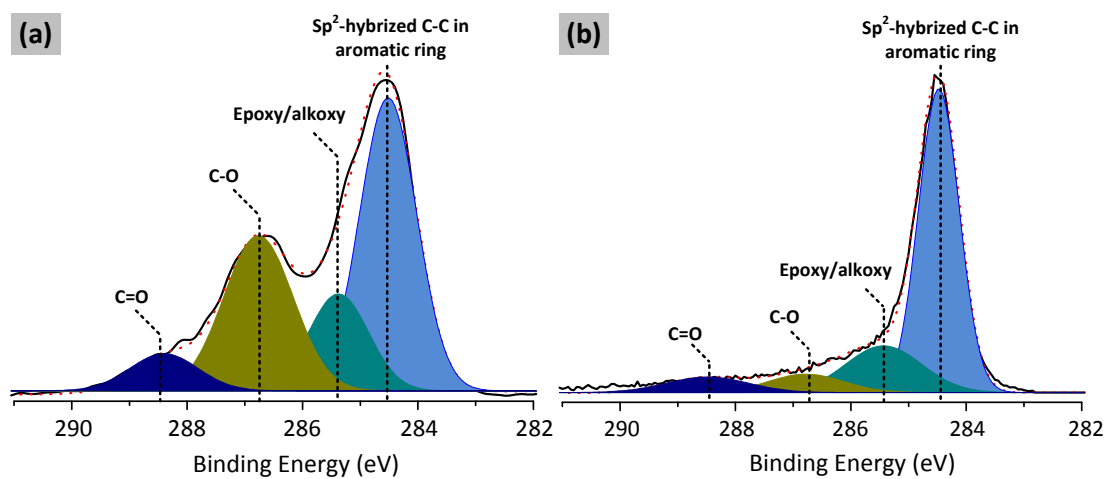

**Figure S3.**  $\text{C}1\text{s}$  XPS profile of (a) GO and (b) RGO(BnOH).

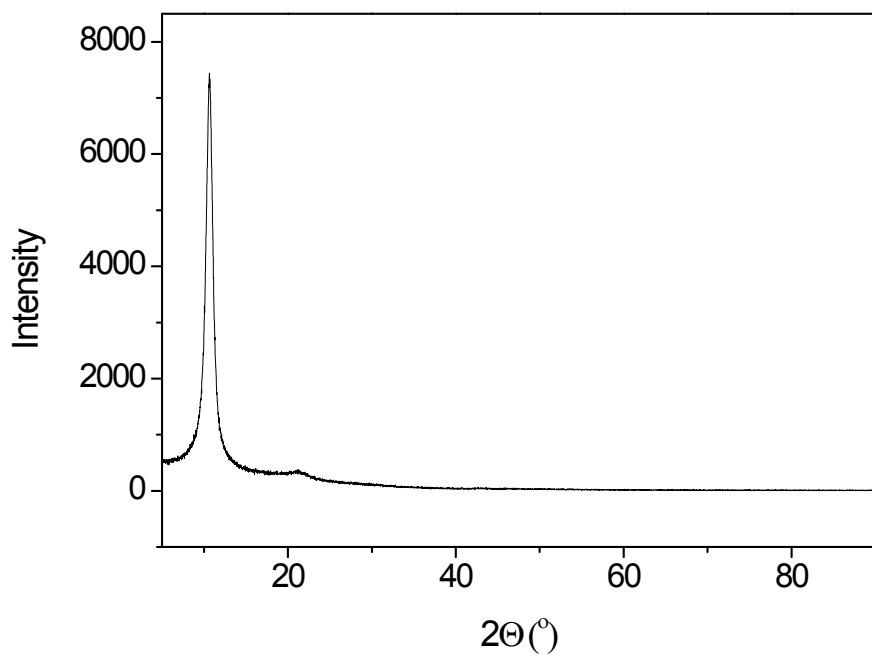

**Figure S4.** XRD pattern of GO.

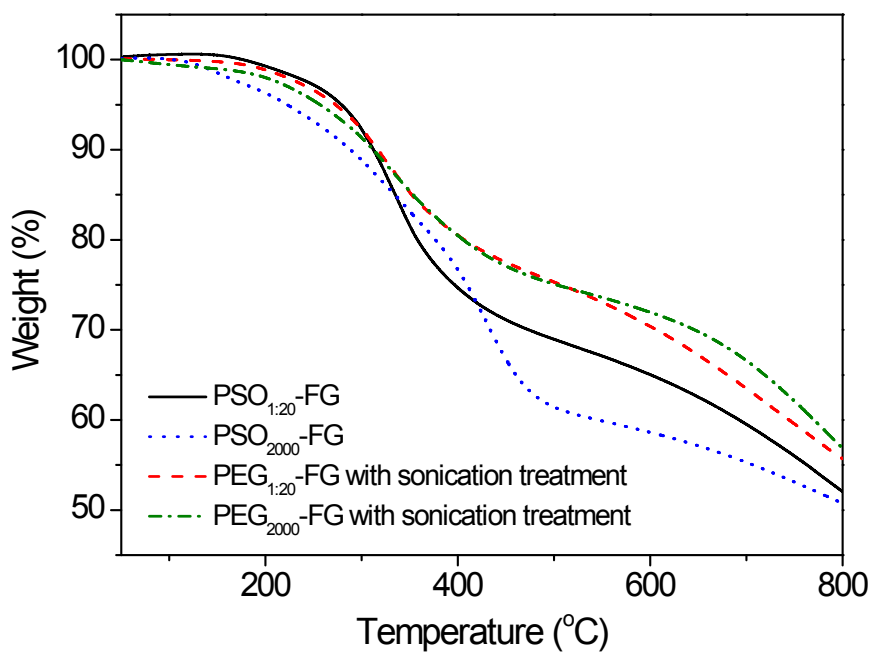

**Figure S5.** TGA curves of polymer-FG and polymer-FG with sonication treatment.

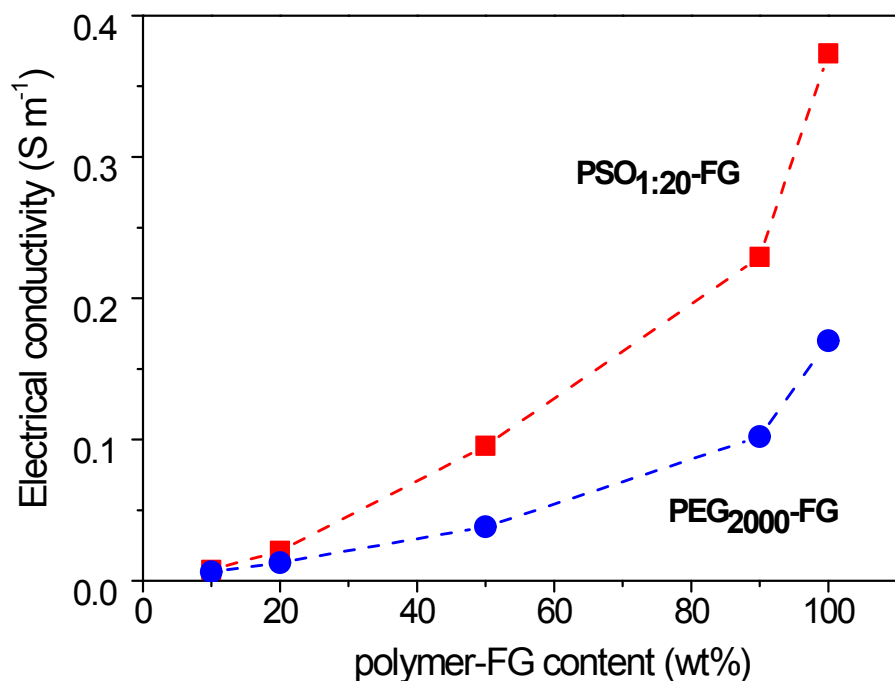

**Figure S6.** Electrical conductive curves of polymer-FG and polymer-FG/PVDF films (measured by AC impedance).

$$\bar{A}_{pg} = \frac{M_C W_P}{M_P W_C} \text{ (chains per carbon)} \quad \text{Eq.S1}$$

Where:  $M_C$  is the relative molar mass of carbon ( $M_C = 12 \text{ g mol}^{-1}$ ),  $M_P$  the average molecular weight ( $M_n$ ) of grafted polymer (calculated from NMR), and  $W_C$  the weight fractions of the polymer functionalized reduced graphene oxide backbone (polymer-FG) (not including grafted polymer).  $W_C$  and  $W_P$  can be readily obtained from the TGA curves of polymer functionalized graphene composite because the polymer functionalized graphene has a weight loss stage below  $600 \text{ }^\circ\text{C}$ , and the decomposed weight fraction above  $800 \text{ }^\circ\text{C}$  is assigned to  $W_P$ .
